# Supplementary material
Source: HighWire-hosted journal article supplement (https://ijssurgery.com/content/16/4/720)
Supplement: inline-supplementary-material-1 [file inline-supplementary-material-1.docx]

Appendix I. Morphine milliequivalent (MME) Conversion Table by Opioid Type

| Type of Opioid (strength units) | MME Conversion Factor |
| --- | --- |
| Hydrocodone (mg) | 1 |
| Hydromorphone (mg) | 4 |
| Morphine (mg) | 1 |
| Oxycodone (mg) | 1.5 |
| Tramadol (mg) | 0.1 |
| Percocet | 1.5 |
| Dilaudid | 4 |
